# Supplementary material for: Conditioning Regimens in Patients with β-Thalassemia Who Underwent Hematopoietic Stem Cell Transplantation: A Scoping Review
Source: MDPI journal article supplement (doi:10.3390/jcm11040907), 2022-02-09
Supplement: s1 [file s1]

**Supplementary Table S1. Search strategy:**

| Database       | Search strategy                                                                                                                                                                                                                                                                                                                                                                                                                                                                                                                                                                   |
|----------------|-----------------------------------------------------------------------------------------------------------------------------------------------------------------------------------------------------------------------------------------------------------------------------------------------------------------------------------------------------------------------------------------------------------------------------------------------------------------------------------------------------------------------------------------------------------------------------------|
| pubmed         | ("thalassaemia"[All Fields] OR<br>"thalassemia"[MeSH Terms] OR<br>"thalassemia"[All Fields] OR<br>"thalassaemias"[All Fields] OR<br>"thalassemias"[All Fields]) AND ("bone<br>marrow transplantation"[MeSH Major<br>Topic] OR ("haematopoietically"[All Fields]<br>OR "hematopoietic system"[MeSH Terms]<br>OR ("hematopoietic"[All Fields] AND<br>"system"[All Fields]) OR "hematopoietic<br>system"[All Fields] OR "haematopoietic"[All<br>Fields] OR "hematopoietic"[All Fields] OR<br>"hematopoietically"[All Fields]) AND "stem<br>cell transplantation"[MeSH Major Topic])) |
| Web Of Science | ALL FIELDS: (thalassemia) AND ALL<br>FIELDS: (((bone marrow<br>transplant) OR (hematopoietic stem cell<br>transplant)))<br>Timespan: All years. Indexes: SCI-<br>EXPANDED, SSCI, A&HCI, CPCI-S, CPCI-<br>SSH, BKCI-S, BKCI-SSH, ESCI, CCR-<br>EXPANDED, IC.                                                                                                                                                                                                                                                                                                                       |
| Scopus         | TITLE-ABS-KEY ( thalassemia ) AND<br>TITLE-ABS-KEY ( ( bone AND marrow<br>AND transplantation ) OR ( hematopoietic<br>AND stem AND cell AND transplant ) ) )                                                                                                                                                                                                                                                                                                                                                                                                                      |
